# Supplementary material for: Azacalix[2]arene[2]carbazoles: synthesis, structure and properties
Source: Royal Society of Chemistry journal article supplement (doi:10.1039/c6ra01197g), 2016-01-01
Supplement: c6ra01197g1.pdf [file c6ra01197g1.pdf]

## Supporting Information

# Azacalix[2]arene[2]carbazoles: Synthesis, Structure and Properties

Hui Xu,<sup>a</sup> Fang-Jun Qian,<sup>a</sup> Qiao-Xia Wu,<sup>a</sup> Min Xue,<sup>b</sup> Yong Yang,<sup>a,\*</sup> and Yong-Xiang

Chen <sup>c,\*</sup>

<sup>a</sup> School of Science, Department of Chemistry, Zhejiang Sci-Tech University, Hangzhou 310018, China.

<sup>b</sup> School of Science, Department of Physics, Zhejiang Sci-Tech University, Hangzhou 310018, China.

<sup>c</sup> Department of Chemistry, Tsinghua University, Beijing, 100190, China.

Email: yangyong@zstu.edu.cn

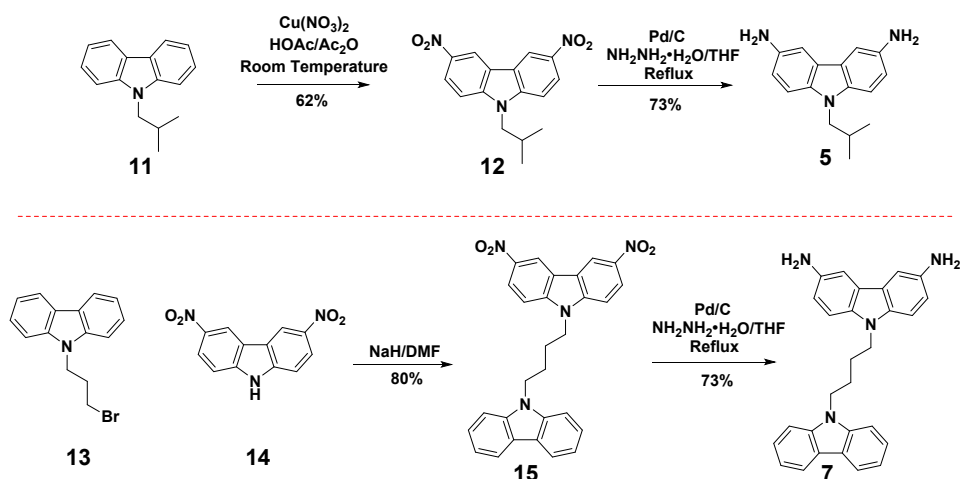

**Scheme 1.** Synthetic routes for 3, 6-diamino derived carbazole intermediates **5** and **7**.

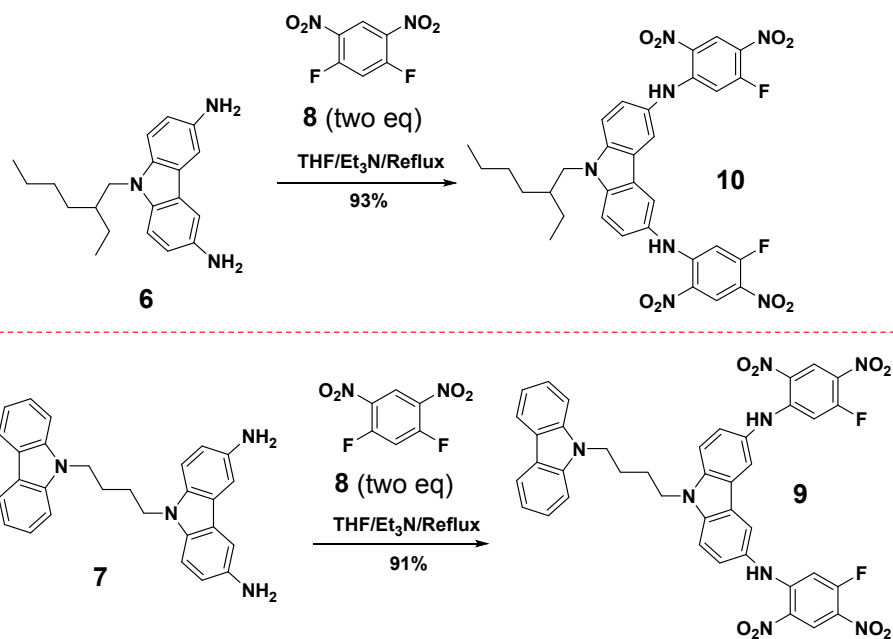

**Scheme 2.** Synthetic routes for “2+1” fragments **9** and **10**.

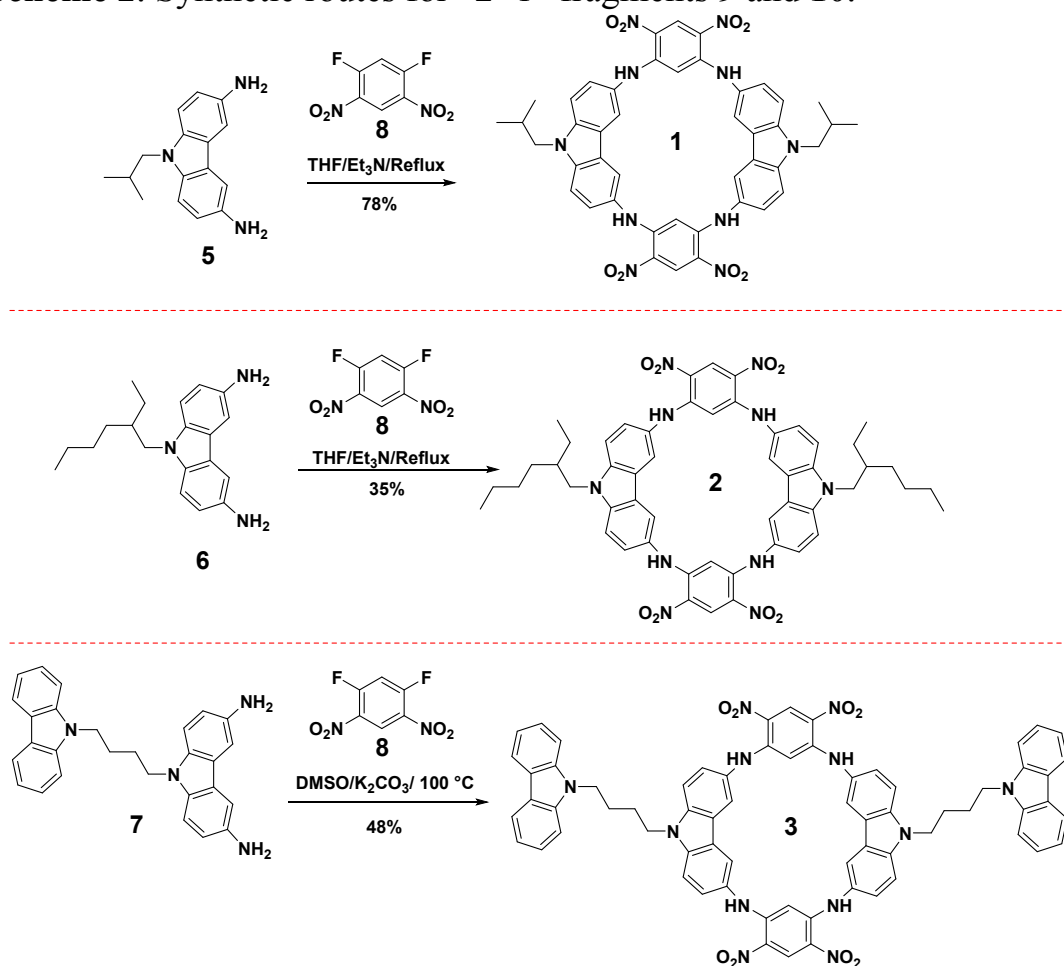

**Scheme 3.** One pot synthesis of symmetric macrocycles **1**~**3**.

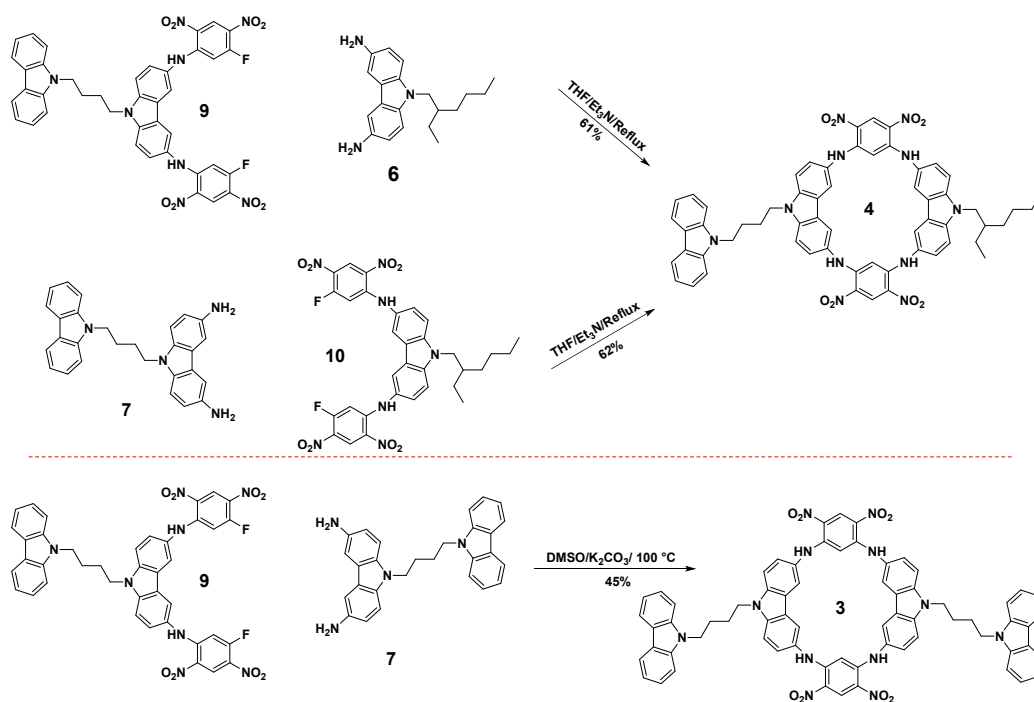

**Scheme 4.** Fragment coupling strategy for the synthesis of unsymmetrical macrocycle **4** and symmetrical macrocycle **3**.

All solvents for reactions and column chromatography were used directly as received. Melting points were uncorrected.  $^1\text{H}$  and  $^{13}\text{C}$  NMR spectra were recorded on a Bruker AV 400 MHz or 300 MHz instruments. Chemical shifts were expressed in parts per million ( $\delta$ ) using residual solvent protons as internal standards. Chloroform ( $\delta = 7.26$  ppm) was used as an internal standard for chloroform-*d*. Alcohol free chloroform was used as solvent for spectroscopic measurements, which was thoroughly washed with distilled water and freshly distilled from  $\text{P}_2\text{O}_5$ . UV-vis data were recorded on UV-2501 PC SHIMADZU.

Compounds **6**<sup>S1</sup>, **11**<sup>S2</sup>, **13**<sup>S3</sup>, and **14**<sup>S4</sup> were synthesized according to similar literature procedures. All NMR experiments were performed on a Bruker AV 400 MHz instruments at 298 K if not specifically indicated.

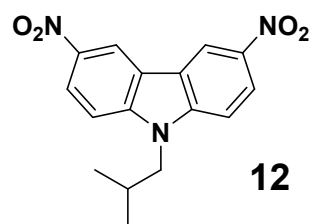

$\text{Cu}(\text{NO}_3)_2 \cdot 3\text{H}_2\text{O}$  (362 mg, 1.5 mmol) was added into a mixture of acetic acid (1 mL) and acetic anhydride (2 mL) at room temperature and the mixture was stirred for 10

min. Then 9-(*iso*-butyl)carbazole **11** (223 mg, 1 mmol) was added slowly in portions over 5 min and heat was generated during the process. An additional 1 mL acetic acid was added. The mixture was stirred at this temperature for 15 min and then poured into distilled water (100 mL). A yellow precipitate was then collected by filtration, washed with water and dried under vacuum. The pure product as a yellow solid (194 mg, 62%) was obtained by recrystallization from ethanol.

Mp: > 300 °C.

<sup>1</sup>H NMR (400 MHz, CDCl<sub>3</sub>, TMS, 298 K, ppm): δ 9.10 (s, 2H, ArH), 8.48 (dd, 2H, *J* = 1.5 Hz, *J* = 9.1 Hz, ArH), 7.53 (d, 2H, *J* = 9.1 Hz, ArH), 4.22 (d, 2H, *J* = 7.5 Hz, CH<sub>2</sub>), 2.39 (m, 1H, CH), 1.02 (d, 6H, *J* = 6.6 Hz, CH<sub>3</sub>).

<sup>13</sup>C NMR (100 MHz, CDCl<sub>3</sub>, TMS, 298 K, ppm): δ 145.1, 141.9, 123.0, 122.5, 117.8, 109.9, 51.6, 29.0, 20.5.

HRMS (ESI<sup>+</sup>) calcd. for [C<sub>16</sub>H<sub>15</sub>N<sub>3</sub>O<sub>4</sub>+Na]<sup>+</sup> 336.0960, found: 336.0951.

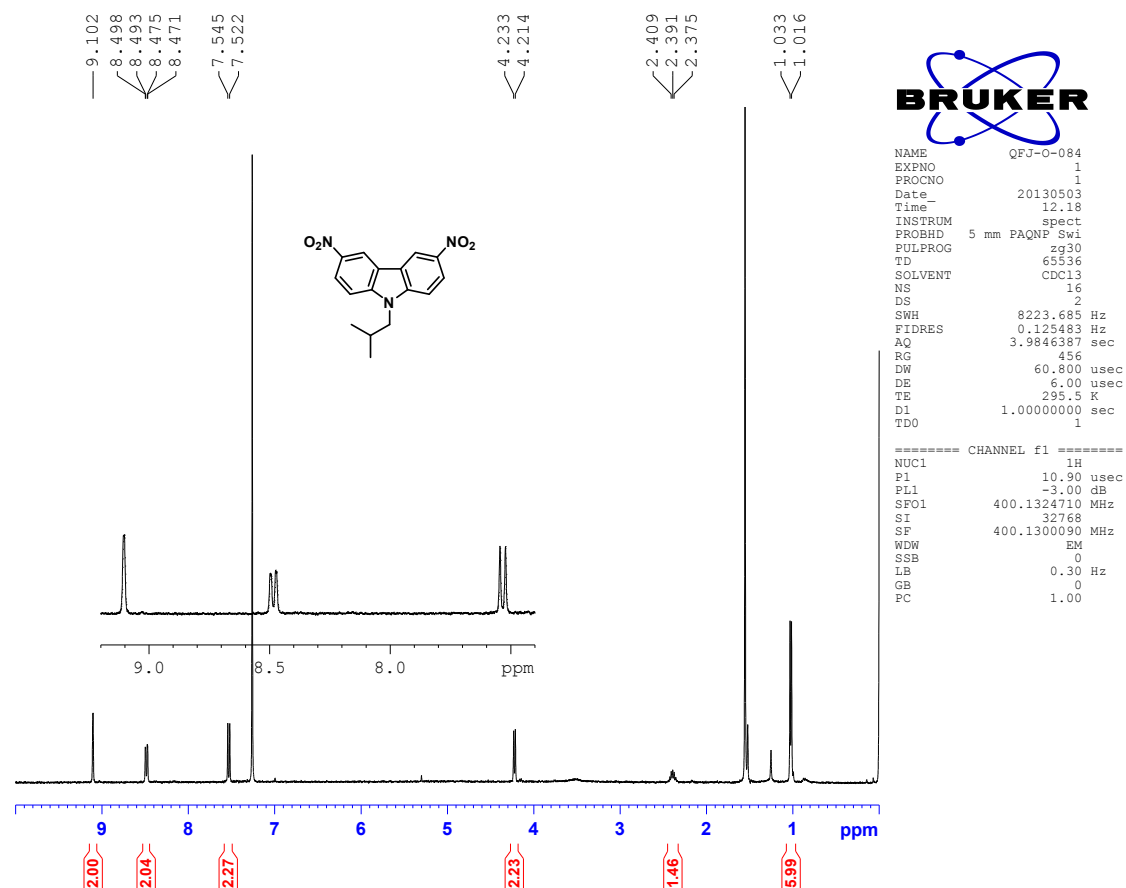

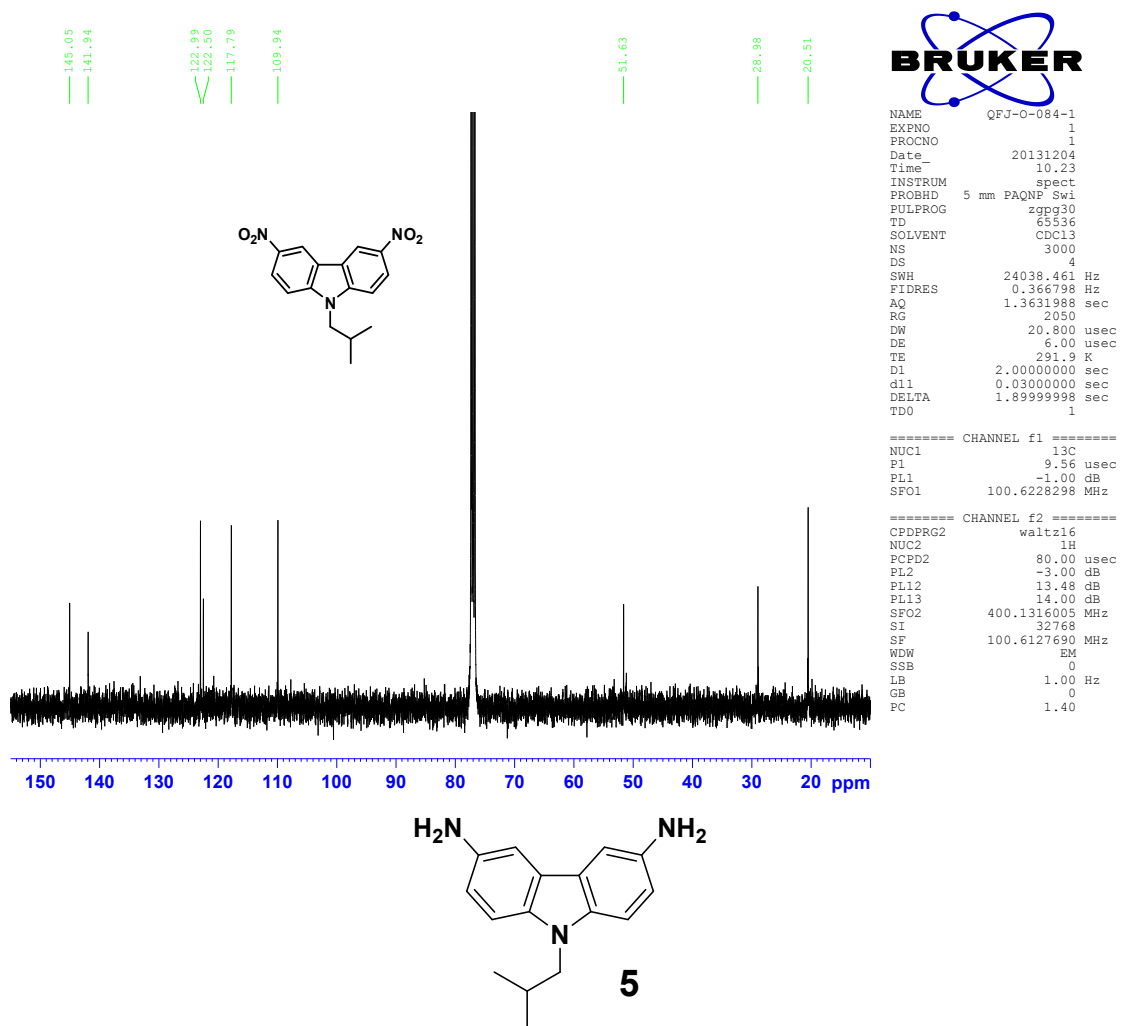

Palladium on active charcoal (10%, 115 mg) was added in portions to a hot solution of 3, 6-dinitro-9-(*iso*-butyl)carbazole **12** (0.423 g, 1.35 mmol) and hydrazine hydrate (1 mL) in THF (30 mL). The mixture was heated under reflux for 5 hours. After cooling to room temperature, the solid was filtrated off and the filtrate was concentrated. The residue was triturated with petroleum ether to give the product as a yellow solid (249 mg, 73%). The product was directly for the next step without further purification and characterization.

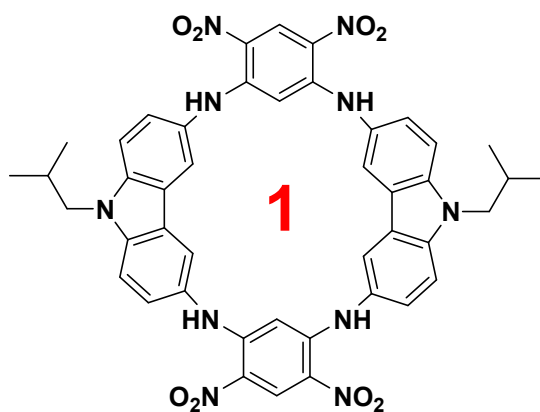

3, 6-Diamino-9-(*iso*-butyl)carbazole **5** (1.012 g, 4 mmol) was added under N<sub>2</sub> atmosphere into a mixture of 1, 5-difluoro-2, 4-dinitrobenzene **8** (0.816 g, 4 mmol) and triethylamine (5.8 mL) in THF (50 mL). Then the mixture was heated to reflux under nitrogen atmosphere overnight. After being cooled to room temperature, an orange solid precipitated from the solution. The solid was collected by filtration and washed with ethanol. The product was pure enough and further purification was not needed (1.3 g, 78%).

Mp: > 300 °C.

<sup>1</sup>H NMR (400 MHz, CDCl<sub>3</sub>, TMS, 298 K, ppm): δ 9.54 (s, 4H, NH), 9.37 (s, 2H, ArH), 7.65 (s, 4H, ArH-carbazole), 7.18 (d, 4H, *J* = 8.1 Hz, ArH-carbazole), 7.06 (d, 4H, *J* = 8.5 Hz, ArH-carbazole), 5.39 (s, 2H, ArH), 3.90 (d, 4H, *J* = 7.4 Hz, CH<sub>2</sub>), 2.16 (m, 2H, CH), 0.80 (d, 12H, *J* = 6.6 Hz, CH<sub>3</sub>).

HRMS (APCI<sup>+</sup>) calcd. for [C<sub>44</sub>H<sub>38</sub>N<sub>10</sub>O<sub>8</sub>+H]<sup>+</sup> 835.2952, found: 835.2940.

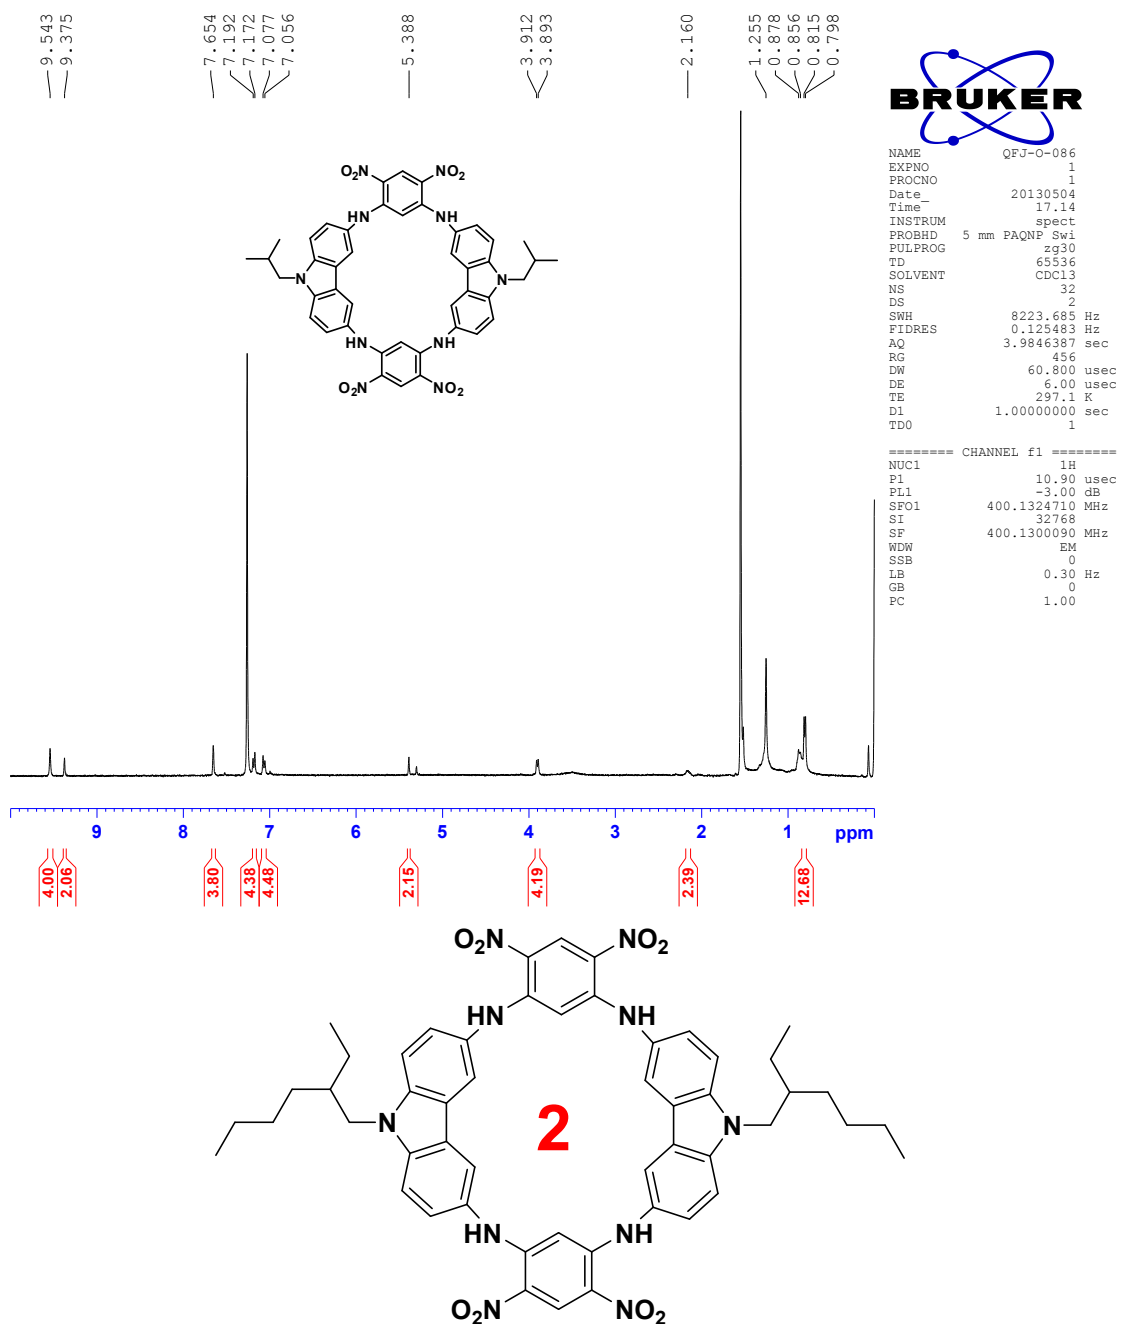

3, 6-Diamino-9-(2-ethylhexyl)carbazole **6** (309 mg, 1 mmol) was added under N<sub>2</sub> atmosphere into a mixture of 1, 5-difluoro-2, 4-dinitrobenzene **8** (204 mg, 1 mmol) and triethylamine (1.4 mL) in THF (30 mL) and the solution was stirred overnight under reflux. After being cooled to room temperature, the reaction mixture was concentrated under reduced pressure. The residue was dissolved in CH<sub>2</sub>Cl<sub>2</sub> (50 mL) and washed with water and dried over anhydrous Na<sub>2</sub>SO<sub>4</sub>. Then the solvent was evaporated under reduced pressure and the residue was subjected to column chromatography (silica gel, dichloromethane as eluent). The product was obtained as

an orange solid (166 mg, 35%).

Mp: > 300 °C.

$^1\text{H}$  NMR (400 MHz,  $\text{CDCl}_3$ , TMS, 298 K, ppm):  $\delta$  9.55 (s, 4H, NH), 9.34 (s, 2H, ArH), 7.66 (s, 4H, ArH-carbazole), 7.19 (d, 4H,  $J = 8.6$  Hz, ArH-carbazole), 7.07 (d, 4H,  $J = 8.5$  Hz, ArH-carbazole), 5.41 (s, 2H, ArH), 4.02-3.87 (m, 4H,  $\text{NCH}_2$ ), 1.94-1.84 (m, 2H, CH), 1.40-1.10 (m, 16H,  $\text{CH}_2$ ), 0.86 (t, 6H,  $J = 6.5$  Hz,  $\text{CH}_3$ ), 0.78 (t, 6H,  $J = 7.2$  Hz,  $\text{CH}_3$ ).

$^{13}\text{C}$  NMR (100 MHz,  $\text{CDCl}_3$ , TMS, 298 K, ppm):  $\delta$  149.6, 140.01, 139.95, 129.2, 128.50, 128.48, 125.8, 124.7, 122.64, 122.60, 119.3, 110.15, 110.10, 95.9, 47.5, 38.9, 30.8, 29.7, 28.62, 28.59, 24.0, 23.0, 14.0, 10.6.

HRMS (APCI $^+$ ) calcd. for  $[\text{C}_{52}\text{H}_{54}\text{N}_{10}\text{O}_8+\text{H}]^+$  947.4204, found: 947.4200.

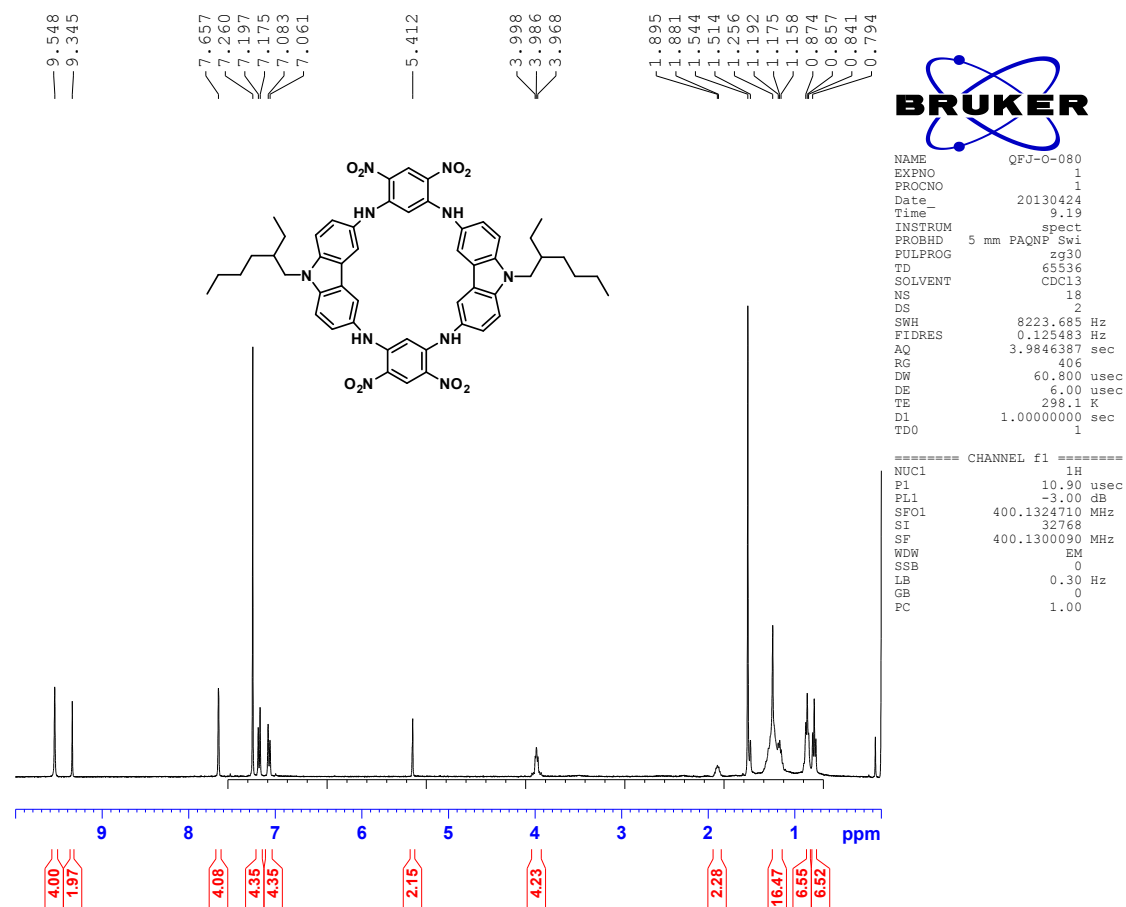



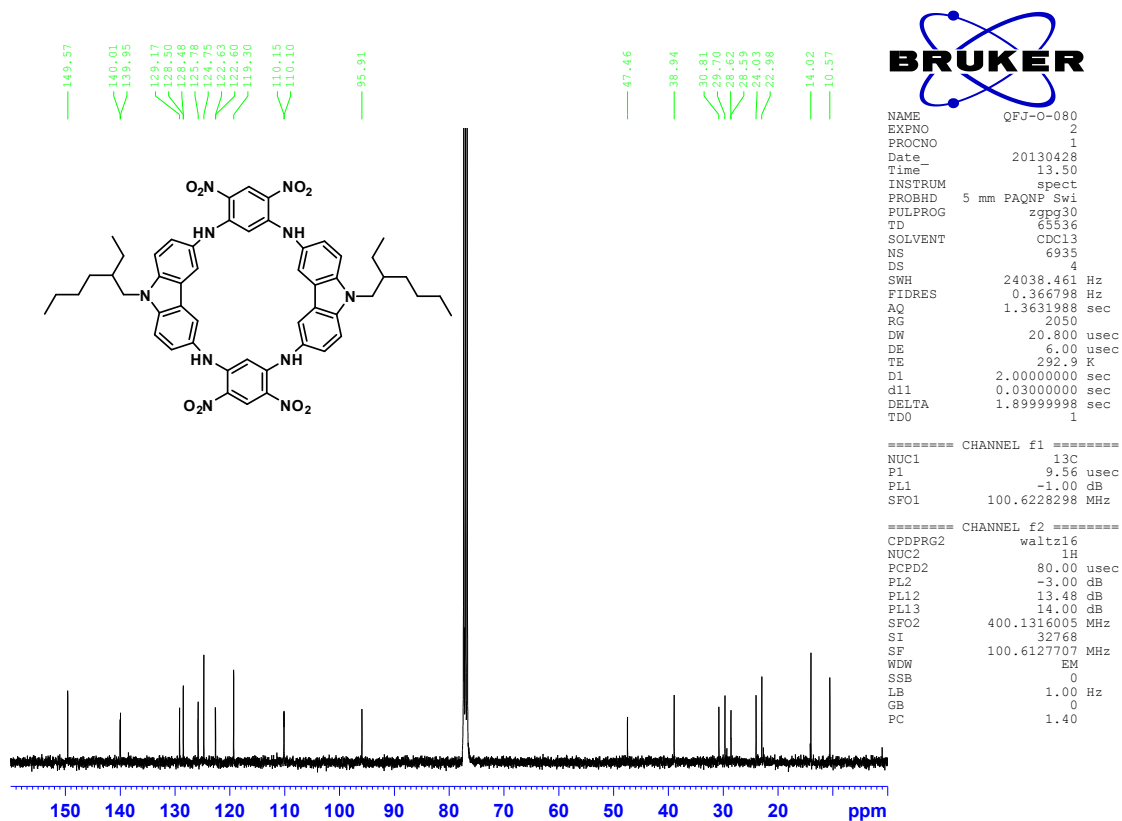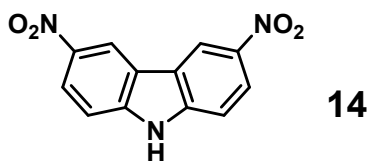

This compound was synthesized according to a similar literature procedure<sup>S4</sup>.

<sup>1</sup>H NMR (400 MHz, DMSO-*d*<sub>6</sub>, TMS, 298 K, ppm): δ 12.71 (s, 1H, *NH*), 9.51 (d, 2H, *J* = 1.8 Hz, *ArH*), 8.40 (dd, 2H, *J* = 1.8 Hz, *J* = 9.0 Hz, *ArH*), 7.77 (d, 2H, *J* = 9.0 Hz, *ArH*).

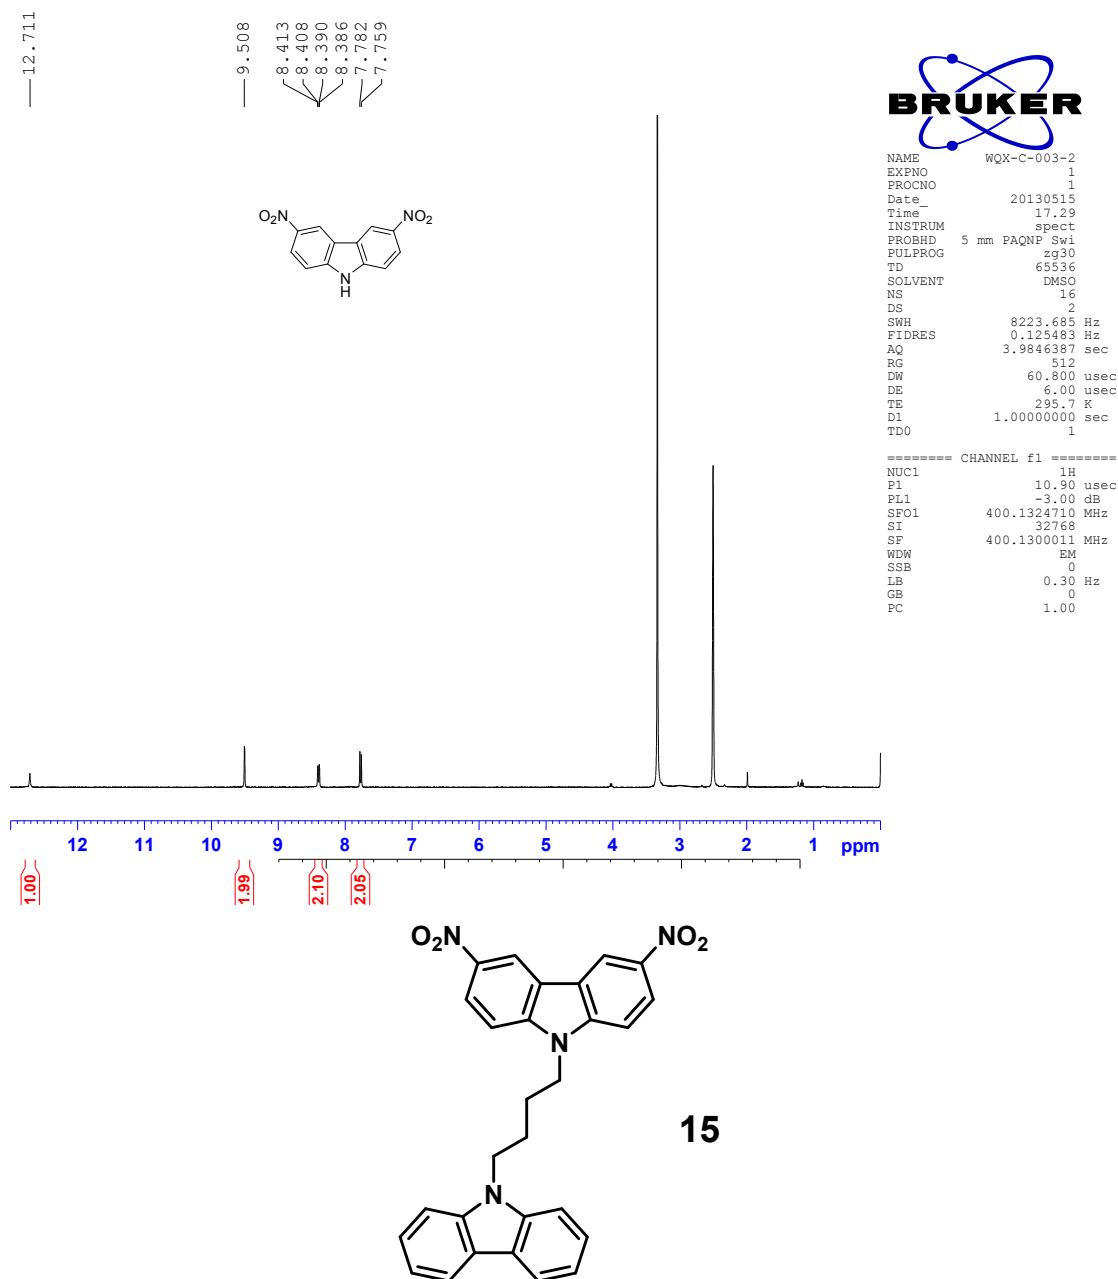

A 100 mL Schlenk flask was charged with 3, 6-dinitro-9*H*-carbazole **14** (1.23 g, 4.8 mmol), NaH (0.211 g, 5.28 mmol, 60% in mineral oil) and 40 mL DMF. The resulting mixture was stirred for 30 min. 9-(4-bromobutyl)-carbazole **13** (1.378 g, 4.8 mmol) was then added under argon and the mixture was stirred at room temperature overnight. The reaction mixture was quenched with 60 mL of water. The solid was collected by filtration and washed with methanol. The pure product as a yellow solid (1.85 g, 81%) was obtained *via* column chromatography (silica gel, petroleum ether: dichloromethane = 1:1 as eluent).

Mp: 253-254 °C.

$^1\text{H}$  NMR (400 MHz,  $\text{CDCl}_3$ , TMS, 298 K, ppm):  $\delta$  8.97 (s, 2H, ArH), 8.31 (d, 2H,  $J = 9.1$  Hz, ArH), 8.07 (d, 2H,  $J = 7.8$  Hz, ArH), 7.41 (t, 2H,  $J = 7.6$  Hz, ArH), 7.26 (t, 4H,  $J = 5.8$  Hz, ArH), 7.09 (d, 2H,  $J = 9.1$  Hz, ArH), 4.34 (t, 2H,  $J = 6.0$  Hz,  $\text{NCH}_2$ ), 4.12 (t, 2H,  $J = 6.9$  Hz,  $\text{NCH}_2$ ), 2.05-1.95 (m, 4H,  $\text{CH}_2$ ).

$^{13}\text{C}$  NMR (100 MHz,  $\text{DMSO}-d_6$ , TMS, 298 K, ppm):  $\delta$  145.0, 141.6, 140.3, 126.1, 123.0, 122.4, 120.7, 119.1, 111.3, 109.7, 43.5, 42.3, 26.4, 26.2.

HRMS (ESI $^+$ ) calcd. for  $[\text{C}_{28}\text{H}_{22}\text{N}_4\text{O}_4+\text{Na}]^+$  501.1539, found: 501.1529; calcd. for  $[\text{C}_{28}\text{H}_{22}\text{N}_4\text{O}_4+\text{K}]^+$  517.1278, found: 517.1269.

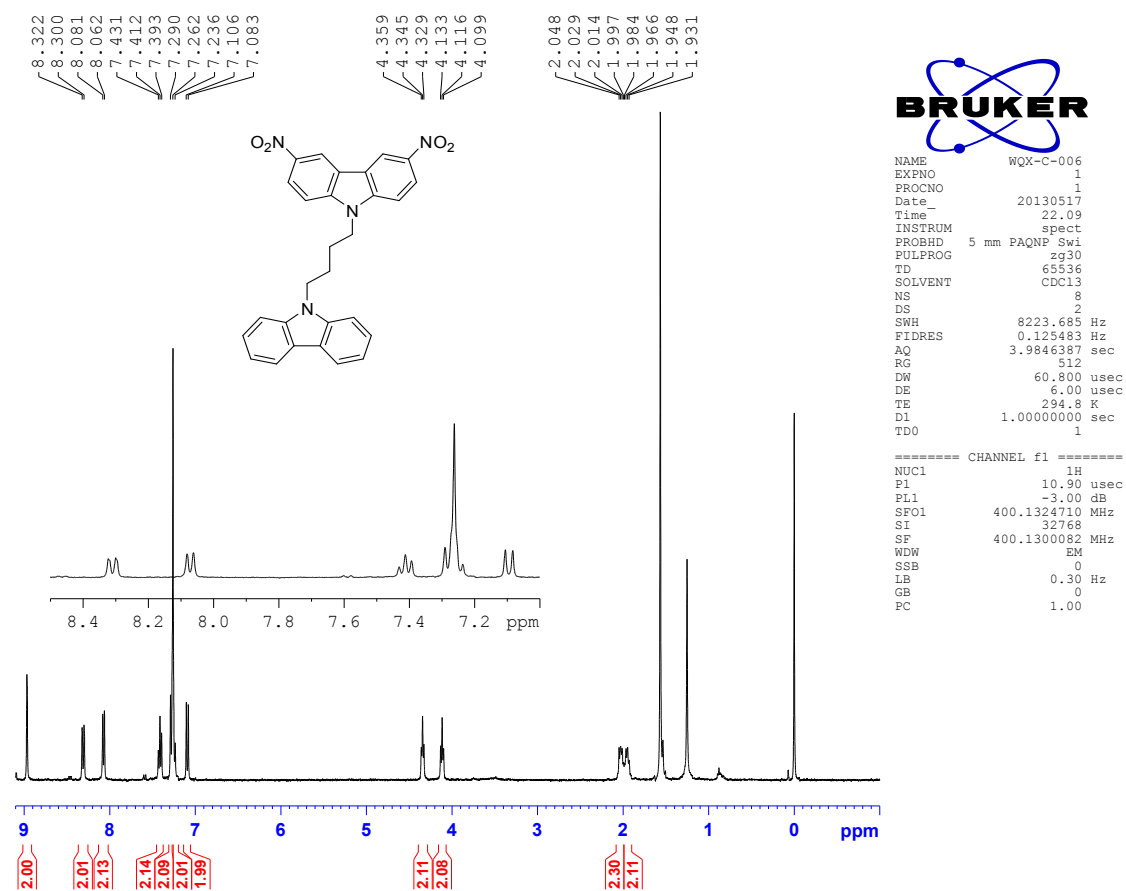

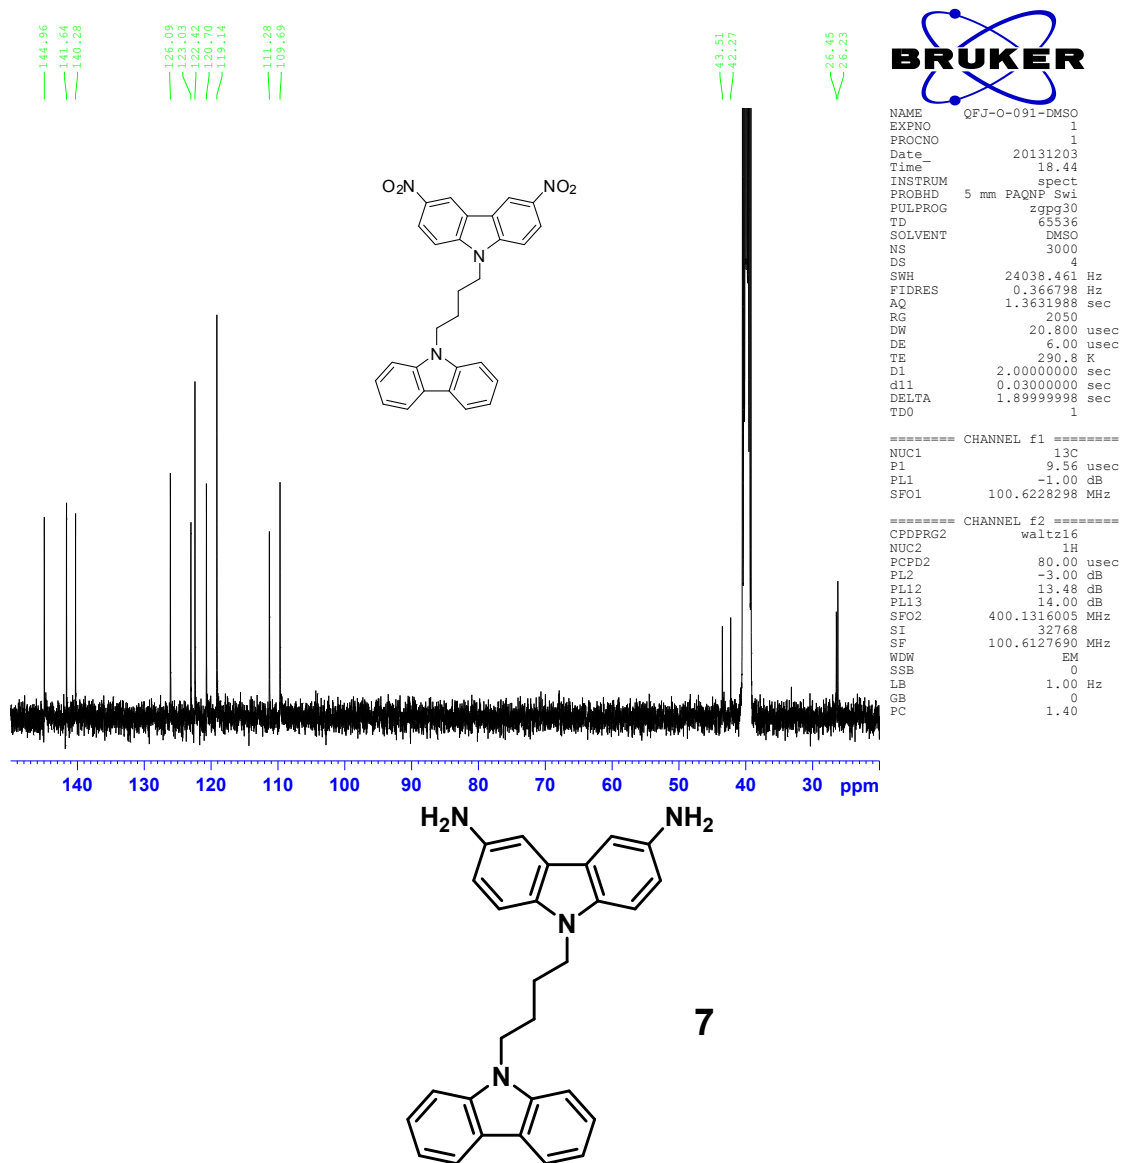

Palladium on charcoal (10%, 115 mg) was added in portions to a hot solution of 9-(4-(9H-carbazol-9-yl)butyl)-3,6-dinitrocarbazole **15** (0.645 g, 1.35 mmol) and hydrazine monohydrate (1 mL) in THF (30 mL) and the mixture was heated under reflux for 5 hours. After being cooled to room temperature the solid was filtrated off and the filtrate was concentrated. The residue was triturated with petroleum ether to give the product as a yellow solid (412 mg, 73%). The product was directly for the next step without further purification and characterization.

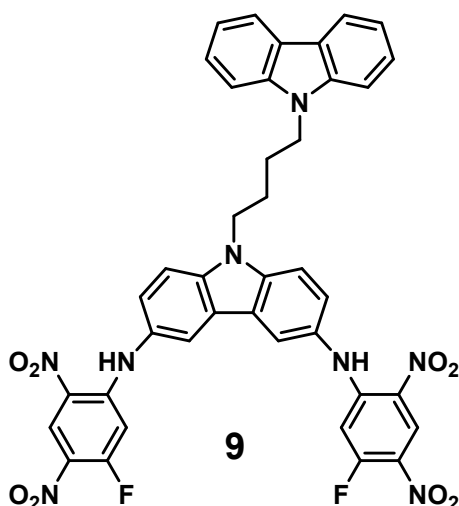

3, 6-diamino-9-(4-(9*H*-carbazol-9-yl)butyl)carbazole **7** (125 mg, 0.3 mmol) was added under N<sub>2</sub> atmosphere into a mixture of 1, 5-difluoro-2, 4-dinitrobenzene **8** (122 mg, 0.6 mmol) and triethylamine (0.5 mL) in THF (20 mL). The solution was stirred overnight under reflux. After being cooled to room temperature, the reaction mixture was concentrated under reduced pressure. The residue was dissolved in CH<sub>2</sub>Cl<sub>2</sub> (50 mL), washed with water and dried over anhydrous Na<sub>2</sub>SO<sub>4</sub>. Then the solvent was evaporated under reduced pressure and the residue was subjected to column chromatography (silica gel, dichloromethane: petroleum ether = 5:1 as eluent). The product was obtained as an orange solid (220 mg, 93%).

Mp: 172-173 °C.

<sup>1</sup>H NMR (400 MHz, CDCl<sub>3</sub>, TMS, 298 K, ppm): δ 10.06 (s, 2H, NH), 9.21 (d, 2H, *J* = 7.8 Hz, ArH), 8.14 (d, 2H, *J* = 7.8 Hz, ArH), 7.92 (s, 2H, ArH), 7.47 (t, 2H, *J* = 7.9 Hz, ArH), 7.38 (d, 2H, *J* = 8.3 Hz, ArH), 7.34-7.27 (m, 6H, ArH), 6.70 (d, 2H, *J* = 13.6 Hz, ArH), 4.41 (t, 2H, *J* = 6.3 Hz, NCH<sub>2</sub>), 4.20 (t, 2H, *J* = 7.0 Hz, NCH<sub>2</sub>), 2.05 (m, 4H, CH<sub>2</sub>CH<sub>2</sub>).

<sup>13</sup>C NMR (100 MHz, CDCl<sub>3</sub>, TMS, 298 K, ppm): δ 160.6, 157.9, 148.9, 148.8, 139.8, 139.6, 127.6, 127.4, 127.0, 125.3, 124.3, 122.7, 122.5, 120.1, 118.7, 118.1, 110.3, 108.0, 102.7, 102.5, 42.9, 42.1, 31.4, 29.2, 26.2, 26.1, 22.2, 13.6.

HRMS (APCI<sup>+</sup>): *m/z* calcd. for [C<sub>40</sub>H<sub>28</sub>F<sub>2</sub>N<sub>8</sub>O<sub>8</sub>+H]<sup>+</sup> 787.2076, found: 787.2059.

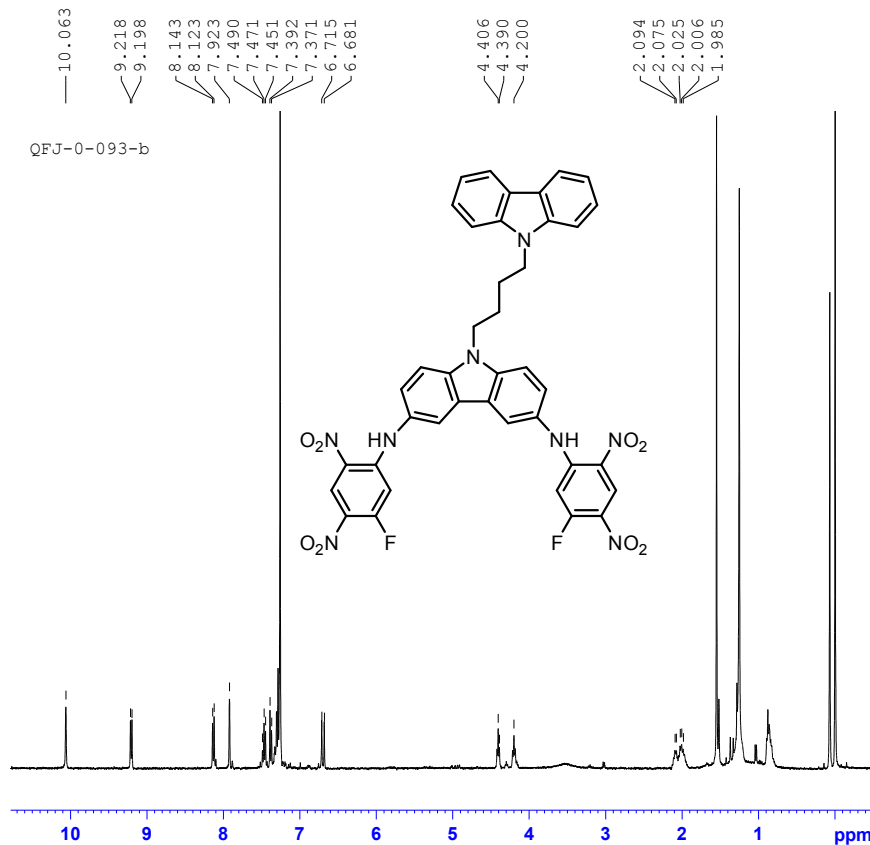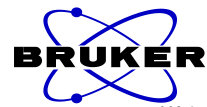

```

NAME      QFJ-0-093-b
EXPNO     2
PROCNO    1
Date_     20130719
Time      14.33
INSTRUM   spect
PROBHD    5 mm PAQNP Swi
PULPROG   zg30
TD        65536
SOLVENT   CDCl3
NS        32
DS        2
SWH       8223.685 Hz
FIDRES    0.125483 Hz
AQ        3.9846387 sec
RG        406
DW        60.800 usec
DE        6.00 usec
TE        294.5 K
D1        1.00000000 sec
TD0       1
  
```

```

===== CHANNEL f1 =====
NUC1      1H
P1        10.90 usec
PL1       -3.00 dB
SFO1      400.1324710 MHz
SI        32768
SF        400.1300087 MHz
WDW       EM
SSB       0
LB        0.30 Hz
GB        0
PC        1.00
  
```

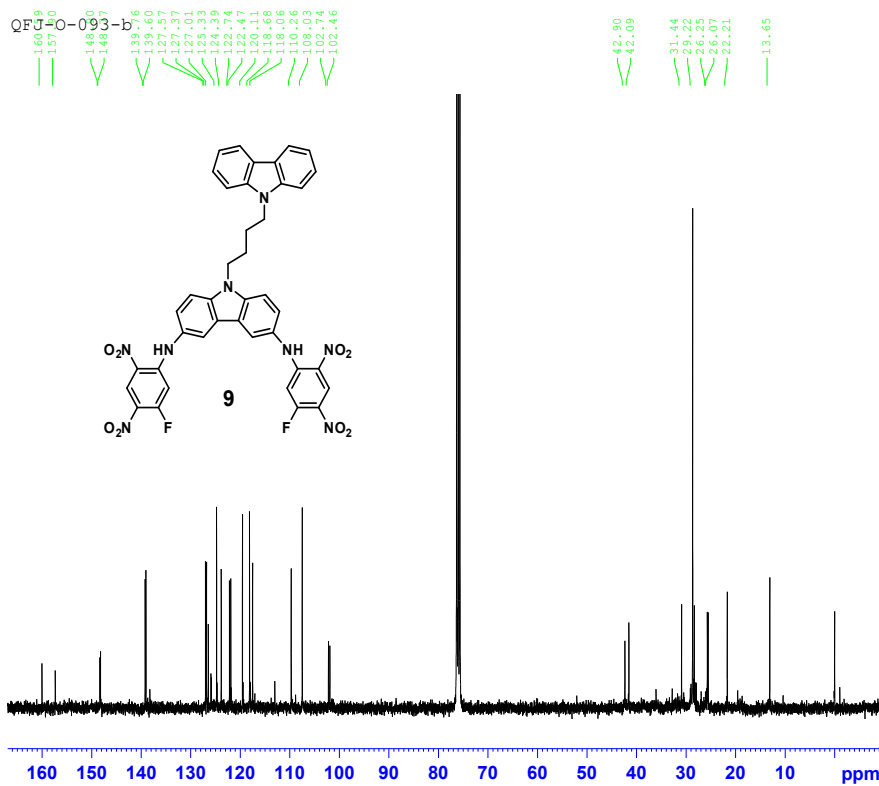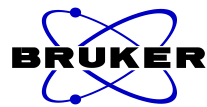

```

NAME      QFJ-0-093-b
EXPNO     1
PROCNO    1
Date_     20130723
Time      16.18
INSTRUM   spect
PROBHD    5 mm PAQNP Swi
PULPROG   zgpg30
TD        65536
SOLVENT   CDCl3
NS        3653
DS        4
SWH       24038.461 Hz
FIDRES    0.366798 Hz
AQ        1.3631988 sec
RG        2050
DW        20.800 usec
DE        6.00 usec
TE        295.6 K
D1        2.00000000 sec
d11       0.03000000 sec
DELTA    1.89999999 sec
TD0       1
  
```

```

===== CHANNEL f1 =====
NUC1      13C
P1        9.56 usec
PL1       -1.00 dB
SFO1      100.6228298 MHz
  
```

```

===== CHANNEL f2 =====
CPDPRG2   waltz16
NUC2      1H
PCPD2     80.00 usec
PL2       -3.00 dB
PL12      13.48 dB
PL13      14.00 dB
SFO2      400.1316005 MHz
SI        32768
SF        100.6128736 MHz
WDW       EM
SSB       0
LB        1.00 Hz
GB        0
PC        1.40
  
```

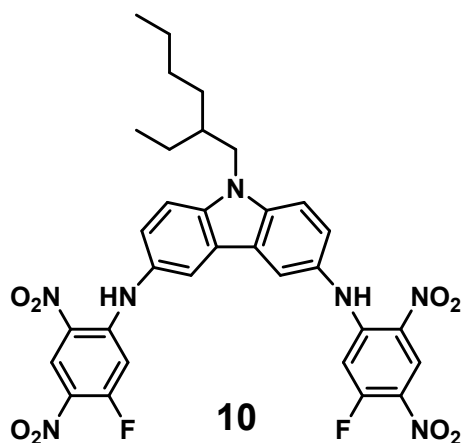

3, 6-Diamino-9-(2-ethylhexyl)carbazole **6** (93 mg, 0.3 mmol) was added under N<sub>2</sub> atmosphere into a mixture of 1, 5-difluoro-2, 4-dinitrobenzene **8** (122 mg, 0.6 mmol) and triethylamine (0.5 mL) in THF (20 mL) and the solution was stirred overnight under reflux. After being cooled to room temperature, the reaction mixture was concentrated under reduced pressure. The residue was dissolved in CH<sub>2</sub>Cl<sub>2</sub> (50 mL) and washed with water and dried over anhydrous Na<sub>2</sub>SO<sub>4</sub>. Then the solvent was evaporated under reduced pressure and the residue was subjected to column chromatography (silica gel, dichloromethane: petroleum ether = 2:1 as eluent). The product was obtained as a reddish brown solid (184 mg, 91%).

Mp: 120-121 °C.

<sup>1</sup>H NMR (400 MHz, CDCl<sub>3</sub>, TMS, 298 K, ppm): δ 10.09 (s, 2H, NH), 9.21 (d, *J* = 7.7 Hz, 2H, ArH), 7.99 (s, 1H, ArH), 7.58 (d, 2H, *J* = 8.6 Hz, ArH), 7.42 (d, 2H, *J* = 8.6 Hz, ArH), 6.75 (d, 2H, *J* = 13.3 Hz, ArH), 4.28 (d, 2H, *J* = 7.3 Hz, CH<sub>2</sub>), 2.16-2.08 (m, 1H, CH), 1.50-1.25 (m, 8H, CH<sub>2</sub>), 0.99 (t, *J* = 7.3 Hz, CH<sub>3</sub>), 0.89 (t, *J* = 6.6 Hz, CH<sub>3</sub>).

<sup>13</sup>C NMR (100 MHz, CDCl<sub>3</sub>, TMS, 298 K, ppm): δ 161.1, 158.4, 149.5, 149.3, 140.8, 128.01, 127.99, 127.8, 127.5, 127.0, 126.9, 124.8, 123.2, 118.5, 111.2, 103.3, 103.0, 48.1, 39.6, 31.0, 29.7, 28.8, 24.5, 23.0, 14.0, 10.9.

HRMS (APCI<sup>-</sup>) calcd. for [C<sub>32</sub>H<sub>29</sub>F<sub>2</sub>N<sub>7</sub>O<sub>8</sub>-H]<sup>-</sup> 676.1967, found: 676.1966.

10.094

9.219  
9.200

7.986  
7.591  
7.569  
7.430  
7.408  
7.261  
6.763  
6.730

4.287  
4.269

2.133  
2.119  
2.106

1.256  
0.991  
0.887  
0.871

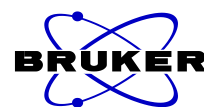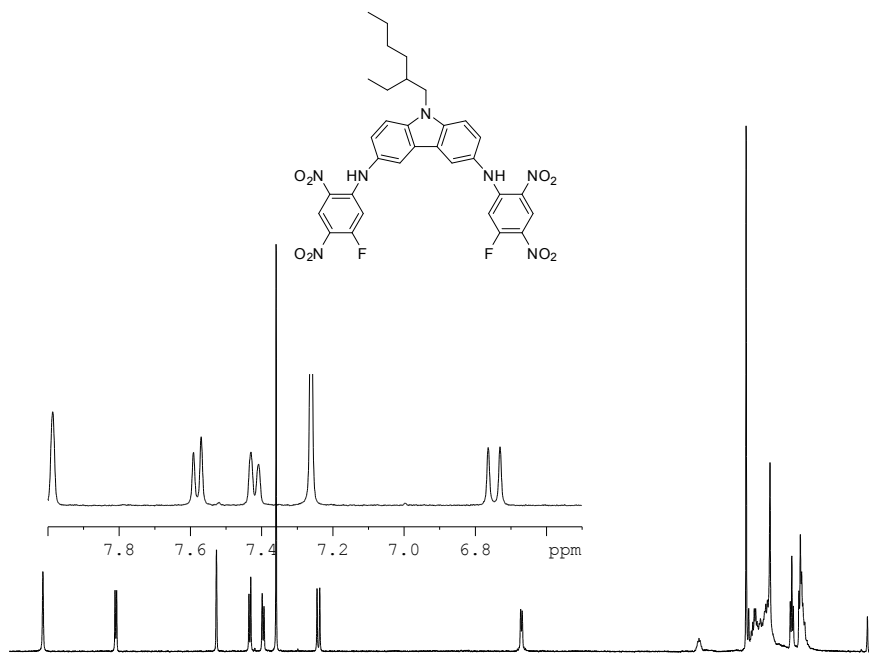

Integration values: 2.00, 1.85, 2.01, 2.11, 2.07, 2.02, 2.03, 1.02, 8.13, 6.53

NAME QFJ-O-108  
EXPNO 2  
PROCNO 1  
Date\_ 20130808  
Time 20.13  
INSTRUM spect  
PROBHD 5 mm PAQNP Swi  
PULPROG zg30  
TD 65536  
SOLVENT CDCl3  
NS 32  
DS 2  
SWH 8223.685 Hz  
FIDRES 0.125483 Hz  
AQ 3.9846387 sec  
RG 512  
DW 60.800 usec  
DE 6.00 usec  
TE 298.1 K  
D1 1.00000000 sec  
TDO 1

===== CHANNEL f1 =====  
NUC1 1H  
P1 10.90 usec  
PL1 -3.00 dB  
SFO1 400.1324710 MHz  
SI 32768  
SF 400.1300090 MHz  
WDW EM  
SSB 0  
LB 0.30 Hz  
GB 0  
PC 1.00

161.09  
158.40  
149.46  
149.33  
140.85  
128.02  
127.99  
127.93  
127.53  
126.96  
126.87  
124.83  
124.83  
118.53  
111.21  
103.28  
103.01

48.05  
39.58  
31.01  
29.70  
28.77  
26.68  
25.09  
16.00  
13.98  
10.94

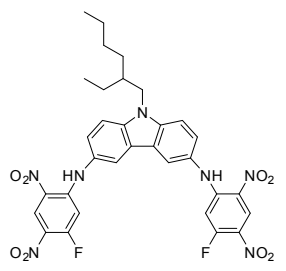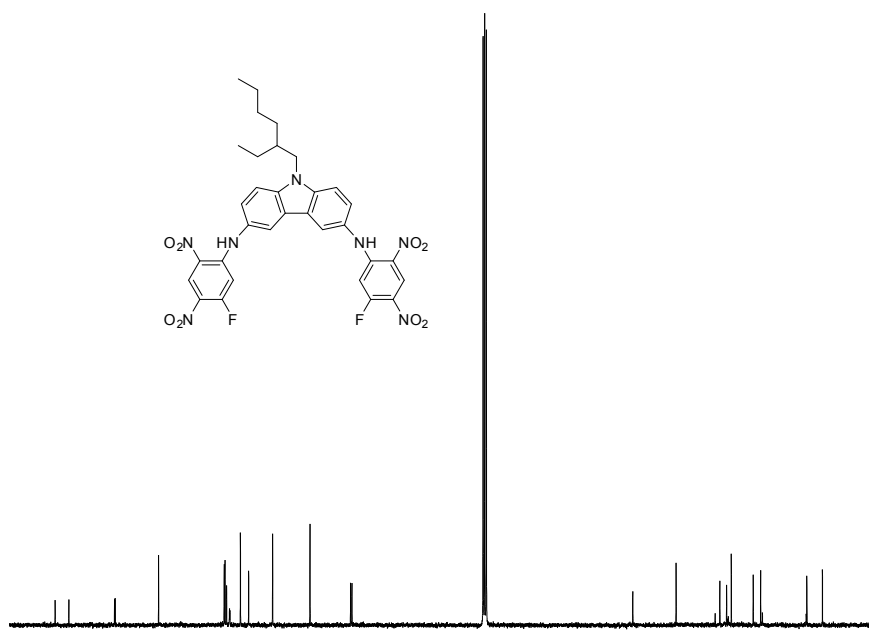

160 150 140 130 120 110 100 90 80 70 60 50 40 30 20 ppm

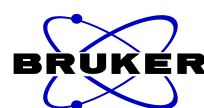

NAME QFJ-O-108  
EXPNO 1  
PROCNO 1  
Date\_ 20130814  
Time 17.51  
INSTRUM spect  
PROBHD 5 mm PAQNP Swi  
PULPROG zgpg30  
TD 65536  
SOLVENT CDCl3  
NS 2048  
DS 4  
SWH 24038.461 Hz  
FIDRES 0.366798 Hz  
AQ 1.3631988 sec  
RG 2050  
DW 20.800 usec  
DE 6.00 usec  
TE 297.7 K  
D1 2.00000000 sec  
d11 0.03000000 sec  
DELTA 1.89999998 sec  
TDO 1

===== CHANNEL f1 =====  
NUC1 13C  
P1 9.56 usec  
PL1 -1.00 dB  
SFO1 100.6228298 MHz

===== CHANNEL f2 =====  
CPDPRG2 waltz16  
NUC2 1H  
PCPD2 80.00 usec  
PL2 -3.00 dB  
PL12 13.48 dB  
PL13 14.00 dB  
SFO2 400.1316005 MHz  
SI 32768  
SF 100.6127690 MHz  
WDW EM  
SSB 0  
LB 1.00 Hz  
GB 0  
PC 1.40



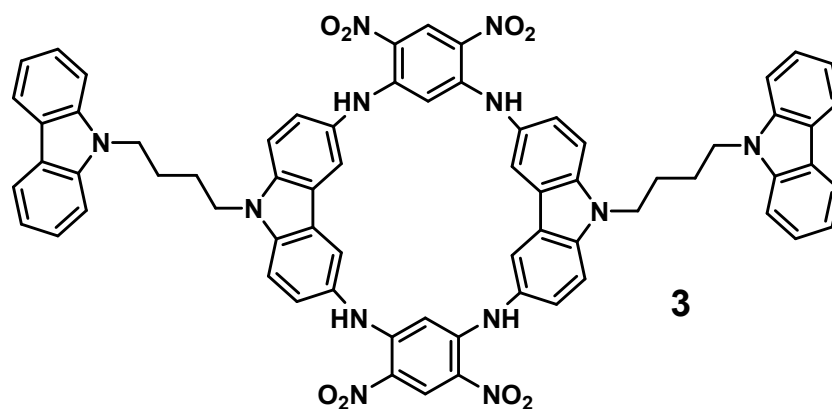

**Fragment Coupling Strategy:** 3, 6-diamino-9-(4-(9*H*-carbazol-9-yl)butyl)carbazole **7** (25 mg, 0.06 mmol), “2+1” fragment compound **9** (47 mg, 0.06 mmol), and anhydrous  $K_2CO_3$  (0.15 mmol, 21 mg) were combined under ambient atmosphere. Anhydrous DMSO (5 mL) was added. The reaction mixture was heated to 100 °C and stirred vigorously overnight. The reaction mixture was then partitioned between EtOAc (40 mL) and  $H_2O$  (30 mL) and the resulting mixture separated. The aqueous layer was extracted twice with EtOAc (10 mL). The combined organic phase was washed with brine (50 mL), dried over anhydrous  $Na_2SO_4$ , filtered, and concentrated in vacuum. The residue was subjected to column chromatography (silica gel, dichloromethane: petroleum ether = 7:1 as eluent). The product was obtained as a yellow solid (31 mg, 45%).

**One Pot Strategy:** 9-(4-(9*H*-carbazol-9-yl)butyl)-9*H*-carbazole-3, 6-diamine **7** (125 mg, 0.3 mmol), 1, 5-difluoro-2, 4-dinitrobenzene **8** (61 mg, 0.3 mmol), and anhydrous  $K_2CO_3$  (0.75 mmol, 104 mg) were combined under ambient atmosphere. Anhydrous DMSO (10 mL) was added. The reaction mixture was heated to 100 °C and stirred vigorously overnight. The reaction mixture was then partitioned between EtOAc (80 mL) and  $H_2O$  (60 mL), the resulting mixture separated. The aqueous layer was extracted twice with EtOAc (30 mL). The combined organic phase was washed with brine (50 mL), dried over anhydrous  $Na_2SO_4$ , filtered, and concentrated in vacuum. The residue was subjected to column chromatography (silica gel, dichloromethane: petroleum ether = 7:1 as eluent). The product was obtained as a yellow solid (83 mg, 48%).

Mp: > 300 °C.

<sup>1</sup>H NMR (400 MHz, DMSO-*d*<sub>6</sub>, TMS, 298 K, ppm): δ 9.64 (s, 4H, NH), 9.05 (s, 2H, ArH), 8.12 (d, 4H, *J* = 7.7 Hz, ArH), 7.56 (d+s, 8H, *J* = 7.3 Hz, ArH), 7.36 (t, 4H, *J* = 7.6 Hz, ArH), 7.14 (t, 4H, *J* = 7.3 Hz, ArH), 7.06 (d, 4H, *J* = 8.7 Hz, ArH), 6.90 (dd, 4H, *J* = 8.6 Hz, *J* = 1.7 Hz, ArH), 4.79 (s, 2H, ArH), 4.39 (t, 4H, *J* = 6.6 Hz, NCH<sub>2</sub>), 3.97 (t, 4H, *J* = 6.8 Hz, NCH<sub>2</sub>), 1.74-1.66 (m, 4H, CH<sub>2</sub>CH<sub>2</sub>), 1.52-1.42 (m, 4H, CH<sub>2</sub>CH<sub>2</sub>).

HRMS (APCI<sup>+</sup>) calcd. for [C<sub>68</sub>H<sub>52</sub>N<sub>12</sub>O<sub>8</sub>+H]<sup>+</sup> 1165.4109, found: 1165.4108.

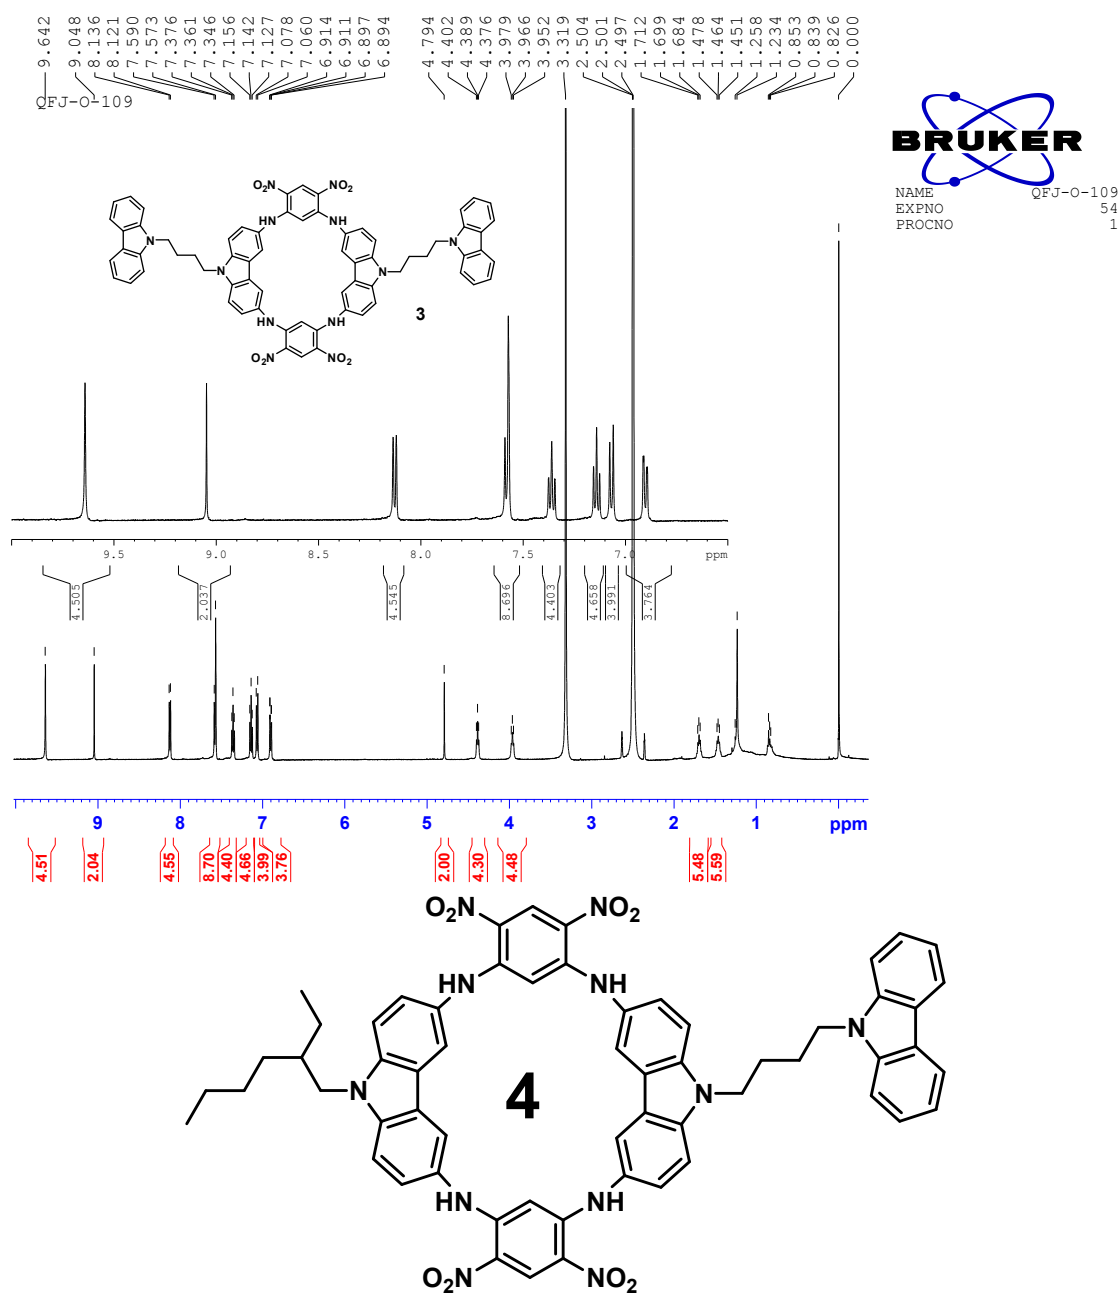

**Strategy one:** 3, 6-Diamino-9-(2-ethylhexyl)carbazole **6** (31 mg, 0.1 mmol) was added under N<sub>2</sub> atmosphere into a mixture of “2+1” fragment compound **9** (79 mg, 0.1

mmol) and triethylamine (0.2 mL) in THF (20 mL) and the solution was stirred overnight under reflux. After being cooled to room temperature, the reaction mixture was concentrated under reduced pressure. The residue was dissolved in CH<sub>2</sub>Cl<sub>2</sub> (50 mL) and washed with water and dried over anhydrous Na<sub>2</sub>SO<sub>4</sub>. Then the solvent was evaporated under reduced pressure and the residue was subjected to column chromatography (silica gel, dichloromethane: petroleum ether = 10:1 as eluent). The product was obtained as an orange solid (64 mg, 61%).

**Strategy two:** 9-(4-(9*H*-carbazol-9-yl)butyl)-9*H*-carbazole-3,6-diamine **7** (125 mg, 0.3 mmol) was added under N<sub>2</sub> atmosphere into a mixture of “2+1” fragment compound **10** (203 mg, 0.3 mmol) and triethylamine (0.5 mL) in THF (20 mL) and the solution was stirred overnight under reflux. After being cooled to room temperature, the reaction mixture was concentrated under reduced pressure. The residue was dissolved in CH<sub>2</sub>Cl<sub>2</sub> (100 mL) and washed with water and dried over anhydrous Na<sub>2</sub>SO<sub>4</sub>. Then the solvent was evaporated under reduced pressure and the residue was subjected to column chromatography (silica gel, dichloromethane: petroleum ether = 10:1 as eluent). The product was obtained as an orange solid (197 mg, 62%).

Mp: > 300 °C. <sup>1</sup>H NMR (400 MHz, DMSO-*d*<sub>6</sub>, TMS, 298 K, ppm): δ 9.680 (s, 2H, NH), 9.673 (s, 2H, NH), 9.06 (s, 2H, ArH), 8.18 (d, *J* = 7.8 Hz, 2H, ArH), 7.66-7.58 (m, 6H, ArH), 7.46 (t, 2H, *J* = 7.7 Hz, ArH), 7.38 (d, 2H, *J* = 8.6 Hz, ArH), 7.23 (t, 2H, *J* = 7.6 Hz, ArH), 7.17(t, 2H, *J* = 4.4 Hz, ArH), 7.03-6.95 (m, 4H, ArH), 4.95 (s, 2H, ArH), 4.48 (t, 2H, *J* = 7.1 Hz, NCH<sub>2</sub>), 4.34 (t, 2H, *J* = 7.2 Hz, NCH<sub>2</sub>), 3.98 (d, 2H, *J* = 7.4 Hz, NCH<sub>2</sub>), 1.90-1.80 (m, 2H, CH<sub>2</sub>CH<sub>2</sub>), 1.75-1.62 (m, 3H, CH<sub>2</sub>CH<sub>2</sub>&CH), 1.06-0.96 (m, 8H, CH<sub>2</sub>), 0.72-0.64 (m, 6H, CH<sub>3</sub>).

HRMS (APCI<sup>+</sup>) calcd. for [C<sub>60</sub>H<sub>53</sub>N<sub>11</sub>O<sub>8</sub>+H]<sup>+</sup> 1056.4157, found: 1056.4153.

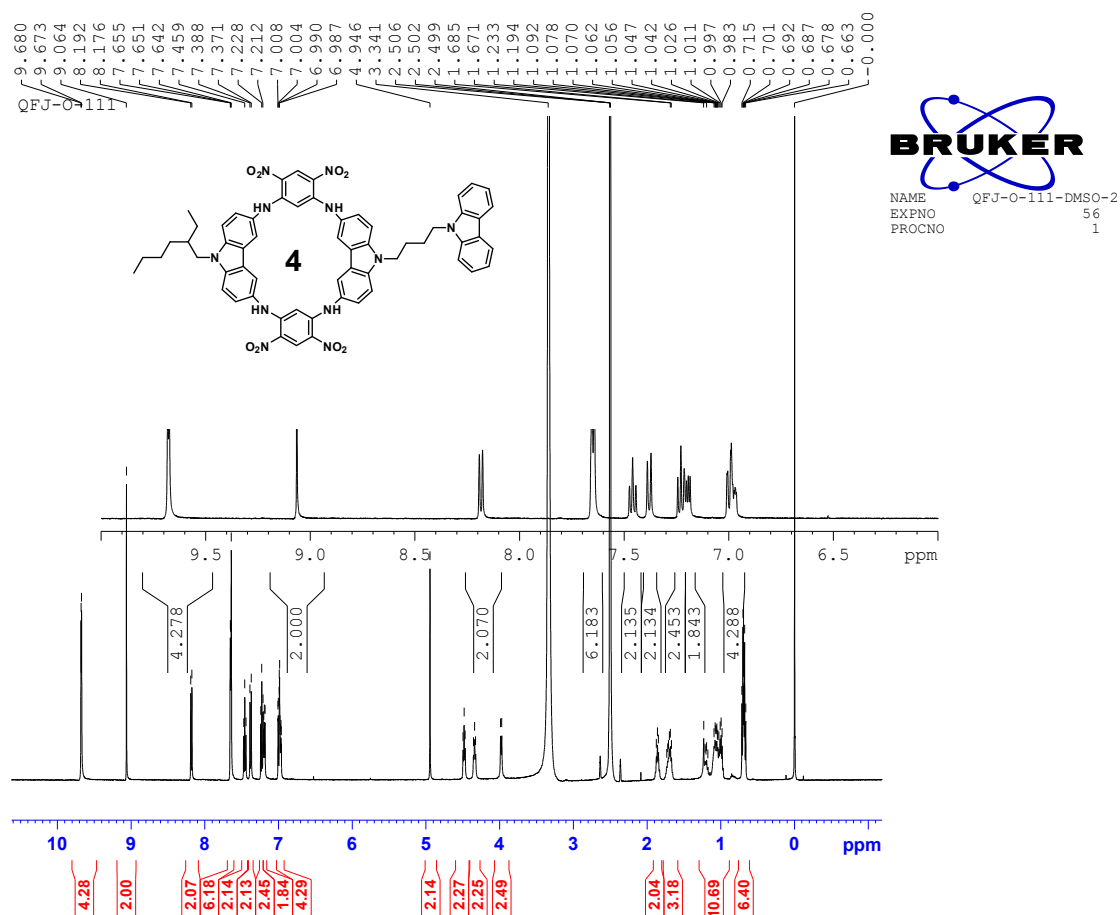

## References:

- S1: Ashok Kumar Mishra.; Josemon Jacob.; Klaus Müllen. *Dyes and Pigments* **2007**, *75*, 1–10.
- S2: Hammond, M.; Elliott, R. L.; Gillaspay, M. L.; Hager, D. C.; Hank, R. F.; LaFlamme, J. A.; Oliver, R. M.; DaSilva-Jardine, P. A.; Stevenson, R. W.; Mack, C. M.; Cassella, J. V. *Biorg. Med. Chem. Lett.* **2003**, *13*, 1989-1992.
- S3: Li, X.; Mintz, E.-A.; Bu, X.-R.; Zehnder, O.; Bosshardb, C.; GuÈnterb, P. *Tetrahedron* **2000**, *56*, 5785–5791.
- S4: Wei-Jia Chen.; Chen-Xi Zhou.; Pei-Fen Yao.; Xiao-Xiao Wang.; Jia-Heng Tan.; Ding Li.; Tian-Miao Ou.; Lian-Quan Gu.; Zhi-Shu Huang. *Bioorg. Med. Chem.* **2012**, *20*, 2829–2836.
